# Supplementary material for: Associations of Assisted Reproductive Technology and Twin Pregnancy With Risk of Congenital Heart Defects
Source: PubMed Central journal article supplement (PMC7042937; doi:10.1001/jamapediatrics.2019.6096), 2020-02-24

## Supplementary Online Content

Wen SW, Miao Q, Taljaard M, et al. Associations of assisted reproductive technology and twin pregnancy with risk of congenital heart defects. *JAMA Pediatr*. Published online February 24, 2020. doi:10.1001/jamapediatrics.2019.6096

**eMethods.** Description of Missing Imputation Process

**eTable 1.** *ICD-10-CA* Diagnosis Code for CHD in CIHI DAD and NACRS Databases

**eTable 2.** Four-way Decompositions of Risk Difference

**eTable 3.** Results of Sensitivity Analysis for the Association of ART with CHD, Ontario, Canada, April 1, 2012, and October 31, 2015

**eFigure.** Record Linkage Strategy for the Study of the Association between ART and CHD, Ontario, Canada, April 1, 2012, to October 31, 2015

## **eMethods.** Description of Missing Imputation Process

The fully conditional specification method uses a sequential regression procedure to impute missing values, assuming a joint distribution for all variables under the assumption of Missing-At-Random (1, 2). A linear regression imputation model was used for maternal age and BMI, while a generalized logit model was used for household income, education level, and parity. All variables used in multivariable analysis were included in imputation models. A total of five imputed datasets were created. Results from the five imputation-completed datasets were combined using the rules developed by Rubin to account for imputation uncertainty (3).

### References

1. van Buuren, S. Multiple Imputation of Discrete and Continuous Data by Fully Conditional Specification. *Statistical Methods in Medical Research* 2007;16:219–42.
2. Little RJA. & Rubin DB. *Statistical Analysis with Missing Data*, Second Edition, New York: John Wiley & Sons, 2002.
3. Rubin DB. *Multiple Imputation for Nonresponse in Surveys*. John Wiley & Sons Inc., New York, 2004.

**eTable 1. ICD-10-CA Diagnosis Code for CHD in CIHI DAD and NACRS Databases**

|      |                                                                                                                                                                                                                                                                                                                                 |
|------|---------------------------------------------------------------------------------------------------------------------------------------------------------------------------------------------------------------------------------------------------------------------------------------------------------------------------------|
| Q20: | Congenital malformations of cardiac chambers and connections                                                                                                                                                                                                                                                                    |
| Q21: | Congenital malformations of cardiac septa                                                                                                                                                                                                                                                                                       |
| Q22: | Congenital malformations of pulmonary and tricuspid valves                                                                                                                                                                                                                                                                      |
| Q23: | Congenital malformations of aortic and mitral valves                                                                                                                                                                                                                                                                            |
| Q24: | Other congenital malformations of heart<br>Include Q24.0, Q24.8, Q24.9, Q26.8, Q26.9, and Q24.2 to Q24.5;<br>Exclude Q24.1 (Laevocardia) and Q24.6 Congenital heart block                                                                                                                                                       |
| Q25: | Congenital malformations of great arteries<br>Include Q25.1 to Q25.9<br>Exclude Q25.0 (Patent ductus arteriosus)                                                                                                                                                                                                                |
| Q26: | Congenital malformations of great veins<br>Include Q26.0 to Q26.4<br>Q26.0 Congenital stenosis of vena cava<br>Q26.1 Persistent left superior vena cava<br>Q26.2 Total anomalous pulmonary venous connection<br>Q26.3 Partial anomalous pulmonary venous connection<br>Q26.4 Anomalous pulmonary venous connection, unspecified |

**eTable 2. Four-way Decompositions of Risk Difference\***

| <b>Four-way decompositions of total effect</b> |  |  |  | <b>Estimate</b> | <b>% of contribution in total risk difference</b> |  |
|------------------------------------------------|--|--|--|-----------------|---------------------------------------------------|--|
| Controlled direct effect                       |  |  |  | 0.08            | 11.76                                             |  |
| Reference interaction                          |  |  |  | 0.004           | 0.59                                              |  |
| Mediated interaction                           |  |  |  | 0.05            | 7.35                                              |  |
| Pure indirect effect                           |  |  |  | 0.55            | 80.88                                             |  |
| Total effect                                   |  |  |  | 0.68            | 100                                               |  |

\* Exposure variable: overall ART vs. natural pregnancy. Mediator: twin pregnancy.  
 Interaction: interaction between twin pregnancy and overall ART on the outcome of CHD.

**eTable 3.** Results of Sensitivity Analysis for the Association of ART with CHD, Ontario, Canada, April 1, 2012, and October 31, 2015

|                                                       | <b>Exposure status</b>           | <b>N of CHD</b> | <b>% of CHD</b> | <b>Crude OR (95% CI)</b> | <b>Adjusted OR (95% CI) *</b> |
|-------------------------------------------------------|----------------------------------|-----------------|-----------------|--------------------------|-------------------------------|
| Without missing imputation                            | ICSI (N=3,938)                   | 91              | 2.31            | 1.92 (1.56-2.37)         | 1.69 (1.32-2.17)              |
|                                                       | IVF (N=6,211)                    | 132             | 2.13            | 1.76 (1.48-2.10)         | 1.76 (1.44-2.14)              |
|                                                       | Overall ART N=10,149)            | 223             | 2.2             | 1.82 (1.59-2.09)         | 1.73 (1.48-2.03)              |
|                                                       | Natural pregnancies (N=497,241)  | 6057            | 1.22            | Reference                | Reference                     |
|                                                       | Twins (N=8,963)                  | 489             | 5.46            | 4.91 (4.47-5.40)         | 4.67 (4.17-5.24)              |
|                                                       | Singletons (N= 498,427)          | 5791            | 1.16            | Reference                | Reference                     |
|                                                       |                                  |                 |                 |                          |                               |
| Included only CHD cases ascertained at or after birth | ICSI (N=3,896)                   | 89              | 2.28            | 1.95 (1.57-2.40)         | 1.70 (1.32-2.19)              |
|                                                       | IVF (N=6,146)                    | 128             | 2.08            | 1.77 (1.48-2.11)         | 1.75 (1.43-2.14)              |
|                                                       | Overall ART (N= 10,042)          | 217             | 2.16            | 1.84 (1.60-2.11)         | 1.73 (1.48-2.03)              |
|                                                       | Natural pregnancies (N= 493,764) | 5865            | 1.19            | Reference                | Reference                     |
|                                                       | Twins (N=8,867)                  | 486             | 5.48            | 5.07 (4.61-5.58)         | 4.82 (4.30-5.41)              |
|                                                       | Singletons (N= 494,939)          | 5596            | 1.13            | Reference                | Reference                     |
|                                                       |                                  |                 |                 |                          |                               |

\* For ART and type of ART: adjusted covariates included maternal age, parity, quintiles of median family income on dissemination area level, quintile of percentage of university degree on dissemination area level, pre-pregnancy obesity, folic acid intake during pregnancy, maternal smoking or social drug use or alcohol consumption, mental health illness in pre-pregnancy or during pregnancy, and pre-pregnancy maternal health condition. In addition, for the exposure of twins, overall ART was also adjusted in the model.

**eFigure.** Record Linkage Strategy for the Study of the Association Between ART and CHD, Ontario, Canada, April 1, 2012, to October 31, 2015

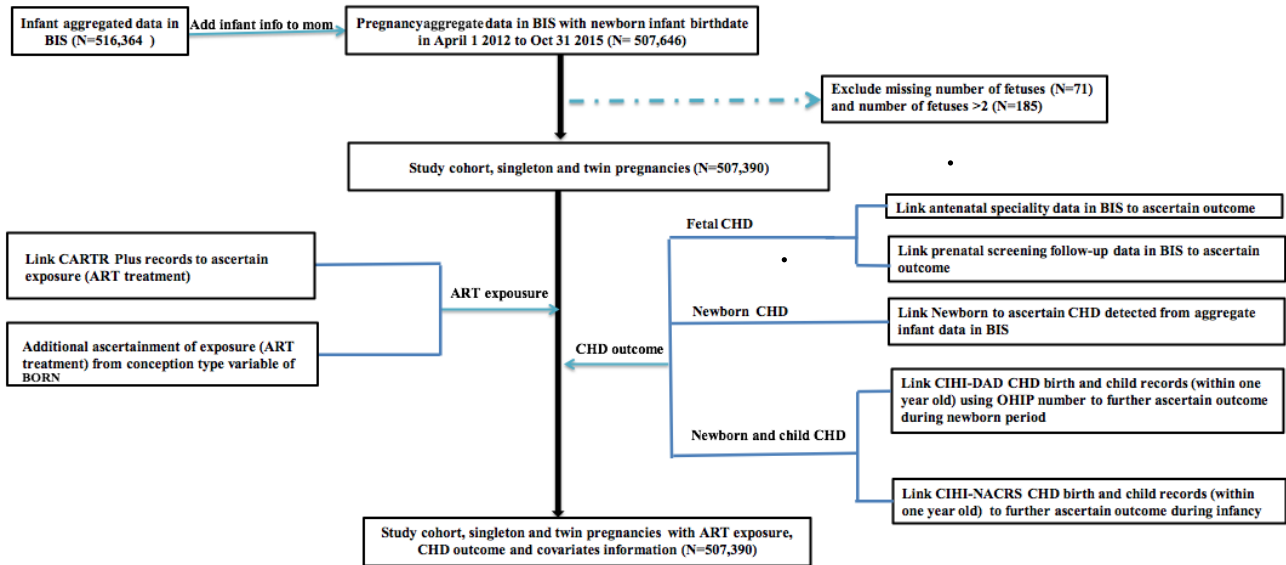

Supplement: jamapediatr-174-446-s001.pdf [file jamapediatr-174-446-s001.pdf]
